# Supplementary material for: Cellular point-of-care diagnostics using an inexpensive layer-stack microfluidic device
Source: Royal Society of Chemistry journal article supplement (doi:10.1039/d2lc00162d), 2022-01-01
Supplement: d2lc00162d1.pdf [file d2lc00162d1.pdf]

**Figure S1. Timelapse of tracer flow through a PLASMIC device.** Blue dye was added to the plasmic and a time-lapse video was collected to study the flow profile within the system. The results of this study match the COMSOL predicted flow profiles, with very high velocity regions in the center of the channel and low velocity regions along the walls.

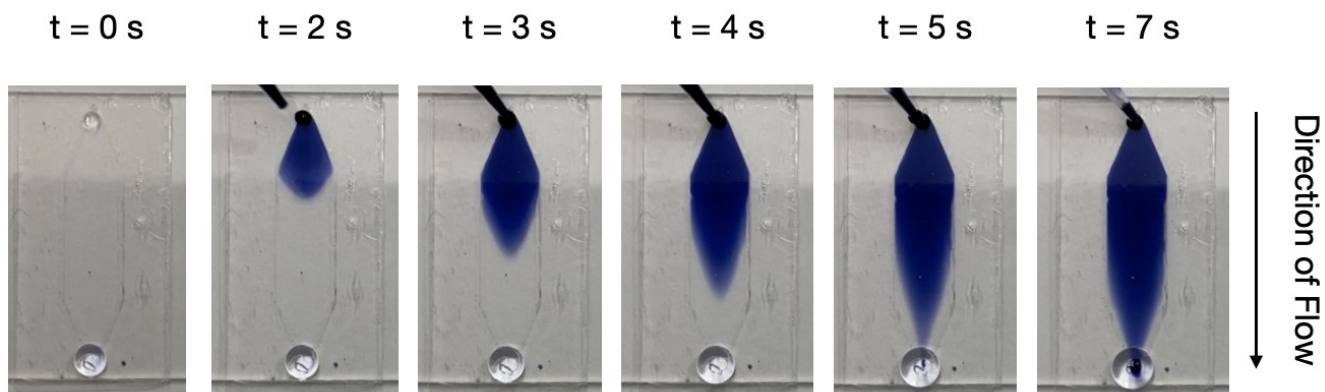

**Table S1: List of antibodies for FAST Staining of immunocyte populations.**  
Antibodies used for analyses of immune cell populations from MC38 tumor FNA samples, including degree of labeling.

| Target protein | Clone   | Isotype     | Vendor     | Catalog # | Degree of labeling |
|----------------|---------|-------------|------------|-----------|--------------------|
| CD19           | 1D3     | Rat IgG2a   | Bio X Cell | BE0150    | 3.62               |
| CD8a           | 53-6.7  | Rat IgG2a   | Bio X Cell | BE0004-1  | 1.98               |
| CD4            | GK1.5   | Rat IgG2b   | Bio X Cell | BE0003-1  | 2.50               |
| Ly6G           | 1A8     | Rat IgG2a   | Bio X Cell | BE0075-1  | 2.17               |
| CD45           | 104.2   | Mouse IgG2a | Bio X Cell | BE0300    | 2.91               |
| CD11c          | N418    | Hamster IgG | Biolegend  | 117302    | 1.83               |
| CD11b          | M1/70   | Rat IgG2b   | Bio X Cell | BE0007    | 3.05               |
| NK1.1          | PK136   | Mouse IgG2a | Biolegend  | 108702    | 2.24               |
| Ly6C           | Monts   | Rat IgG2a   | Bio X Cell | BE0203    | 3.77               |
| TCR $\beta$    | H57-597 | Hamster IgG | Biolegend  | 109215    | 2.32               |
| F4/80          | Cl:A3-1 | Rat IgG2b   | Bio X Cell | BE0206    | 3.49               |
| MHCII          | M5/114  | Rat IgG2b   | Bio X Cell | BE0108    | 1.56               |
